1 **Proposed Title:** Integrating NHANES and Toxicity Forecaster Data to Compare Pesticide  
2 Exposure and Bioactivity by Farmwork History and US Citizenship

3  
4 **Keywords:** toxicology, bioactivity, environmental health, human health, pesticides, occupational  
5 health, farmworkers

6  
7 **Authors:** Chanese A. Forté<sup>1,2</sup>, Jess A. Millar<sup>3,4</sup>, and Justin Colacino<sup>1,5,6</sup>

8  
9 **Author Affiliations:** 1. The University of Michigan School of Public Health, Department of  
10 Environmental Health Sciences, Ann Arbor, MI, USA

11 2. The University of Michigan, College of Engineering, Michigan Institute of Computational  
12 Discovery and Engineering, Ann Arbor, MI, USA

13 3. The University of Michigan School of Public Health, Department of Epidemiology, Ann Arbor,  
14 MI, USA

15 4. The University of Michigan Medical School, Department of Computational Medicine and  
16 Bioinformatics, Ann Arbor, MI, USA

17 5. The University of Michigan School of Public Health, Department of Nutritional Sciences, Ann  
18 Arbor, MI, USA

19 6. University of Michigan College of Literature, Sciences, and the Arts, Program in the  
20 Environment, Ann Arbor, MI, USA

21  
22 **ORCIDs:**

23 Chanese A. Forté, 0000-0002-6540-3180

24 Jess A. Millar, 0000-0001-8945-3396

25 Justin Colacino, 0000-0002-5882-4569

26

27 **Corresponding Author:**

28 Justin Colacino,

29 +1 734 – 647 – 4347

30 [colacino@umich.edu](mailto:colacino@umich.edu)

31 6611D SPH1, 1415 Washington Heights

32 Ann Arbor, MI, 48104

33

34 **Abstract**

35

36 Introduction— Farmworkers in the United States, especially migrant workers, face unique  
37 barriers to healthcare and have documented disparities in health outcomes. Exposure to  
38 pesticides, especially those persistent in the environment, may contribute to these health  
39 disparities.

40

41 Methods—We queried the National Health and Nutrition Examination Study (NHANES) from  
42 1999-2014 for pesticide exposure biomarker concentrations among farmworkers and non-  
43 farmworkers by citizenship status. We combined this with toxicity assay data from the US  
44 Environmental Protection Agency's (EPA's) Toxicity Forecast Dashboard (ToxCast). We  
45 estimated adverse biological effects that occur across a range of human population-relevant  
46 pesticide doses.

47

48 Results—In total, there were 1,137 people with any farmwork history and 20,205 non-  
49 farmworkers. Of the 14 commonly detectable pesticide biomarkers in NHANES, 2,4-  
50 dichlorophenol (OR= 4.32,  $p= 2.01 \times 10^{-7}$ ) was significantly higher in farmworkers than non-  
51 farmworkers. Farmworkers were 1.37 times more likely to have a bioactive pesticide biomarker  
52 measurement in comparison to non-farmworkers (adjusted OR=1.37, 95% CI: 1.10, 1.71).  
53 Within farmworkers only, those without U.S. citizenships were 1.31 times more likely to have  
54 bioactive pesticide biomarker concentrations compared those with U.S. citizenship (adjusted OR  
55 1.31, 95% CI: 0.75, 2.30). Additionally, non-citizen farmworkers were significantly more  
56 exposed to bioactive levels of  $\beta$ -hexachlorocyclohexane (BHC) (OR= 8.50,  $p= 1.23 \times 10^{-9}$ ), p,p-  
57 DDE (OR= 2.98,  $p= 3.11 \times 10^{-3}$ ), and p,p'-DDT (OR= 10.78,  $p= 8.70 \times 10^{-4}$ ).

58

59 Discussion— These results highlight pesticide exposure disparities in farmworkers, particularly  
60 those without U.S. citizenship. Many of these exposures are occurring at doses which are  
61 bioactive in toxicological assays.

62

## 63 1.1 Introduction

64 Pesticide exposure has been linked to a myriad of human health outcomes such as obesity,  
65 immune alteration, cancer, neurological conditions, type II diabetes mellitus, and death (Wei et  
66 al. 2014; Zong et al. 2018; Medehouenou et al. 2019). More specifically, many pesticides are  
67 strong endocrine disruptors because they mimic hormones like estrogens and androgens (Briz  
68 et al. 2011; Wong et al. 2019). Persistent pesticides last in the environment and human body for  
69 years or even decades and can bioaccumulate and bioconcentrate. Persistent pesticides  
70 include organochlorines like dichlorodiphenyltrichlorethane (DDT), Lindane, Chlordane, Dieldrin,  
71 Heptachlor and their metabolites. Non-persistent pesticides include organophosphates,  
72 carbamates, pyrethroids, chlorinated phenols, acyl alanine fungicides and more chemical  
73 groups, and were thought to be the less harmful answer to previously used persistent chemicals  
74 (e.g. organochlorines) (Abubakar et al. 2020). However, non-persistent chemicals still affect  
75 human health. While pesticides are associated with endocrine disruption, cancers, and motor  
76 neuron disorders, there is still a lack of human health data on the dose-response, toxicological  
77 mechanisms, or how population exposure concentrations relate to social determinants of health  
78 (Mostafalou and Abdollahi 2013; Dhananjayan and Ravichandran 2018).

79 Social determinants of health like occupation or citizenship can alter both exposure and  
80 health outcomes related to chemicals like pesticides. Healthcare policy and services are limited  
81 to non-existent for immigrants and especially migrant workers residing in the United States  
82 (US). For example, many policies that on the surface appear highly beneficial for the American  
83 people like the Affordable Care Act of 2010, actually exclude immigrants completely from  
84 accessing care (Quesada et al. 2011). In addition, agreements like the North American Free  
85 Trade Agreement between the US, Canada, and Mexico limit migrant worker rights (Barnes  
86 2013). Moreover, migrant worker health is often unprotected by the law and workplace  
87 discrimination leaves migrant workers very vulnerable (Quesada et al. 2011; Ramos et al. 2016;  
88 Ramos 2018; Saxton and Stuesse 2018). Prior research on migrant workers in the US Midwest

89 found factors like economics, logistics, and health significantly affected the mental health of  
90 migrant workers (Ramos et al. 2015). Overall, a gap exists in the quantification of pesticide  
91 exposure among farmworkers and migrant workers, and specifically how these exposures may  
92 differ by worker category or US citizenship status.

93 A major challenge in the field of occupational and environmental health is understanding  
94 and predicting the health effects of exposure to chemicals like pesticides. There are currently  
95 85,000 chemicals on the global market that Toxic Substances Control Act (TSCA) has listed in  
96 its inventory of substances, and there is little to no experimental toxicology or epidemiology data  
97 on many of them (Attene-Ramos et al. 2013; Adeola 2021). In 2008, the US Environmental  
98 Protection Agency (EPA) collaborated with multiple other federal agencies including the Food  
99 and Drug Administration and the National Institute of Environmental Health Sciences to create  
100 the Toxicology in the 21<sup>st</sup> Century (Tox21) program (Thomas et al. 2018). The goal of Tox21 is  
101 to develop high throughput testing methods to determine the safety of chemicals such as food  
102 additives and pesticides. Additionally, Tox21 quantifies the biological mechanisms that  
103 chemicals alter to prioritize the chemicals being tested and generate a wealth of data to predict  
104 toxicological responses in the human body (Attene-Ramos et al. 2013; Thomas et al. 2018).  
105 These data are a rich, but untapped, resource to characterize the dose-dependent effects of  
106 exposure to pesticides in the context of social determinants of health like occupation and  
107 citizenship. This data is then presented in the Toxicity Forecast Dashboard (ToxCast).

108 To address these gaps and understand how pesticide exposure and effects vary by  
109 occupation and citizenship, this study's goal is to determine if people residing in the US are  
110 exposed to bioactive concentrations of pesticides. This project has the following aims: 1)  
111 quantify and compare pesticide biomarkers among farmworkers and non-farmworkers, 2)  
112 quantify and compare pesticide biomarkers between citizen and non-citizen farmworkers, 3)  
113 compare exposure concentrations to known bioactive benchmark concentrations in the Tox21  
114 high throughput toxicity data (ToxCast). We hypothesized that on average farmworkers will have

115 higher concentrations of pesticides biomarkers than non-farmworkers. Furthermore, among  
116 farmworkers, we hypothesize that non-citizens will have higher pesticide biomarker  
117 concentrations than US citizens. Additionally, we hypothesize people residing in the US will be  
118 exposed to bioactive concentrations of pesticides. Moreover, we hypothesize farmworkers will  
119 be exposed to bioactive concentrations of pesticides more frequently than non-farmworkers.

120

## 121 **1.2 Methods**

122 Our overall study design involves comparing the distributions of chemical biomarker  
123 concentrations in The National Health and Nutrition Examination Survey (NHANES) with the  
124 distributions of doses for those chemicals which exhibit bioactivity in ToxCast. In addition, we  
125 quantify which cellular target families are most often affected by these pesticides and look to  
126 see how these target families differ by history of farmwork and U.S. citizenship status.

127

### 128 ***1.2.1 The National Health and Nutrition Examination Survey (NHANES)***

129 NHANES is a cross-sectional study representative of the US population with  
130 oversampling weights for minoritized populations. NHANES is a cross sectional assessment of  
131 the health and nutrition of adults and children residing within the US. The current iteration of the  
132 continuous study began in 1999. Study participants are enrolled on a continuous basis, with  
133 data analyzed and deposited in two-year windows. NHANES collects extensive information on  
134 the study participants such as self-reported occupation, urinary and serum biomarkers, and self-  
135 reported demographics such as age, gender, citizenship, poverty index ratio, and education.

136

### 137 ***1.2.2 Study Population***

138 This study included NHANES study participants aged 18 years and older who also had  
139 occupation and pesticide exposure data present between 1999 and 2014. This study integrated  
140 29 datasets from NHANES laboratory data to understand pesticide exposure, occupation, and

141 demographics of the study population. From the Industry and Occupation Survey, individuals  
142 were coded as “farmworker” or “non-farmworker” using the Current Industry (OCD230=1,  
143 OCD231=1), Current Occupation (OCD240=18, OCD241=18), Longest Industry (OCD390=1,  
144 OCD391=1), and Longest Occupation (OCD392=18), where all participants who put  
145 “Agriculture, Forestry and Fishing” were coded as a farmworker.

146 From the demographics data, DMDEDUC2 (older than 18 years of age) and DMDEDUC3 (18  
147 years of age and younger) were combined to create one education level based on the  
148 DMDEDUC2 categories. The US citizenship variable (DMDCITZN) is defined as 1= “Citizen by  
149 Birth or naturalization” and 2= “Not a citizen of the US”, and we removed anyone who  
150 responded with “Refused”, “Don’t Know”, or skipped the question.

151

### 152 **1.2.3 Biomonitoring Samples and Detectability**

153 NHANES performs chemical biomonitoring in study participants urine and blood.  
154 Participants provided partial urine void in a sterile sampling cup at the mobile examination  
155 center. Blood samples are collected by certified laboratory professionals. Urine and blood  
156 samples are then analyzed for chemical metabolites using isotope dilution gas chromatography  
157 high-resolution mass spectrometry (GC/IDHRMS). Pesticide biomarkers measured in blood  
158 samples and reported as either 1) fresh weight basis (i.e., pg/g serum) and 2) lipid weight basis  
159 (i.e., ng/g lipid). The lipid adjusted values account for blood lipid concentrations and are of  
160 particular importance for the accurate quantification of lipophilic pesticides (Barr et al. 2005).

161 All urinary biomarker measurements were adjusted for urinary creatinine, and all blood  
162 pesticide biomarker measurements were blood lipid adjusted. Detectability percentages were  
163 calculated by dividing the total number of measurements above LOD by the total number of the  
164 chemical’s measurements in NHANES. To ensure that we included chemicals with values  
165 above the limit of detection in most of the study participants, detection frequency percentages of



166 50% and higher across the population were maintained which resulted in 14 chemicals of  
167 interest (Silver et al. 2018).

168 These chemicals included the following: 2,4-Dichlorophenol (24DCP), 2,4-  
169 Dichlorophenoxyacetic acid (24D acid), 2,5-Dichlorophenol (25DCP), 3,5,6-Trichloropyridinol  
170 (TCP), 4-Nitrophenol,  $\beta$ -hexachlorocyclohexane ( $\beta$ -HCH), diethyltoluamide acid (DEET acid),  
171 Dieldrin, Heptachlor Epoxide, 3-phenoxybenzoic acid (3-PBA), p,p'-DDE, and p,p'-DDT.  
172 Additionally, the measurements of TCP, a chlorpyrifos metabolite, were compared to the  
173 ToxCast toxicity data for both CPF and chlorpyrifos-oxon (CPO).

174

#### 175 **1.2.4 Toxicity Forecast Dashboard Data**

176 The US EPA's Toxicity Forecast Dashboard (ToxCast) is a collection of publicly  
177 available high throughput toxicity data intended to make chemical assessment more accessible  
178 by allowing researchers to search which chemicals show toxicological effects more easily within  
179 human tissue. High throughput toxicity screening initiatives have been developed to quantify  
180 biological effects of chemicals, including pesticides, *in vitro*. Dose response curves are created  
181 for each chemical and assay, and from these curves the activation concentrations and positive  
182 hitcalls are defined. ACC is the concentration at which the model reaches the cut-off values for  
183 the chemical to be considered active and is based on the levels of significance for the dose  
184 curve response. The ACC can be used as a proxy of potency to determine the genes, proteins,  
185 enzymes, effects on biological pathway and viabilities at which chemicals are active.

186

#### 187 **1.2.5 Comparing NHANES and ToxCast**

188 Using the corresponding Chemical Abstracts Service Registry Numbers (CASRNs)  
189 obtained from PubChem, data from ToxCast were matched to NHANES. From this new dataset,  
190 we created pesticide concentration distribution boxplots by the chemical and farmwork history or  
191 U.S. citizenship in the *tidyverse* using the *ggplot2* R package (Wickham 2016). Pesticide

192 distributions were overlaid onto the same axis to quantify overlap between the pesticide  
193 concentration distributions of exposure in NHANES participants and bioactivity in ToxCast. To  
194 visualize the distribution of exposure in comparison to pesticide bioactivity concentrations,  
195 ToxCast ACCs and NHANES biomarker concentrations were plotted as boxplots using molarity  
196 units.

197

### 198 **1.2.6 Statistical Analysis**

199 All data management and analysis were completed in R version 4.1.3. All code for our  
200 work can be found on our GitHub repository (Millar and Forté 2023). Graphics were created  
201 using the *ggplot2* package library (Wickham 2016). All NHANES data was downloaded using  
202 the RNHANES packaged in R (Susmann 2016). The main outcomes of this project include 1)  
203 quantifying the distribution of the pesticide concentrations across NHANES and ToxCast, 2)  
204 quantifying the demographics of people with and without bioactive measurements, and 3)  
205 investigating how bioactivity differs by chemical, farmwork history, and US citizenship status.  
206 These outcomes inform the overarching project question of whether people residing in the US  
207 are exposed to bioactive levels of pesticides, how these bioactive pesticides affect the body,  
208 and whether the rates of exposure to bioactive pesticide concentrations vary based on  
209 sociodemographic factors.

210 We labeled anyone who had at least one chemical measurement equal to or above the  
211 minimum ToxCast ACC for that chemical as being “bioactive”. Anyone who did not fit this group  
212 was defined as “non-bioactive.” Demographics were quantified by bioactivity status among all  
213 study participants and then among farmworkers only. For continuous variables like body mass  
214 index (BMI) or age in years, we present the mean and standard error, and for all categorical  
215 variables, the stratified frequencies and sub-group percentages are provided.

216 Differences in demographic factors by group or citizenship were tested using a  
217 Pearson's chi-square test, using a Rao and Scott Adjustment where necessary for categorical

218 variables. Low response was defined as 8 or less respondents within one stratum. And for  
219 continuous variables, a Wilcoxon Rank test was used to test group means, with a Kruskal-  
220 Wallis Correction. All significance testing was completed using the NHANES Full Sample 2 and  
221 4 Year MEC Exam Weights. A new weight variable titled “MEC16YR” was created using the  
222 weighted MEC 2- and 4-year measurements to represent the weights used from 1999-2002 and  
223 each year after, respectively.

224 Non-citizen status was determined by the NHANES variable DMDCITZN. We calculated  
225 bioactivity by the chemical and marked measurements as bioactive based on their hitcall  
226 equaling 1. For model outcomes this bioactivity status by chemical was used as the outcome  
227 variable for logistic regression models used to investigate how the odds of being a farmworker  
228 and having at least one bioactive measurement differ from non-farmworkers by the chemical.  
229 These models were adjusted for BMI, age, poverty index ratio (PIR), survey year, gender, racial  
230 ethnicity, U.S. citizenship status, farmwork history, country of birth and education level. After  
231 comparing all study respondents’ odds of having a bioactive measure, we created logistic  
232 regression models comparing U.S. citizenship status. These models were also adjusted for BMI,  
233 age, PIR, survey year, gender, racial ethnicity, country of birth, and education level.

234 Education status was constructed NHANES variables DMDEDUC2 and DMDEDUC3 to  
235 include four categories: Less than 9th grade, 9-11th grade (Includes 12th grade with no  
236 diploma), High school grad/GED or equivalent, and More than high school. Farmworker status  
237 was constructed using NHANES industry or occupation group codes for current job (OCD230,  
238 OCD231) or longest job (OCD390, OCD391, OCD392) that included the terms  
239 agriculture/agricultural or farming.

240 For lipid adjusted blood measurements, molarity was calculated by multiplying the  
241 measurement by serum density of 1.024 g/mL and dividing by molecular weight (Sniegowski and  
242 Moody 1979). Urinary measurements were calculated by dividing the measurement by molecular  
243 weight. All measurements of molarity have units of  $\mu\text{mol/L}$ .

244 Data from the 1999-2002, 2003-2004, 2005–2006, 2007–2008, 2009–2010, 2011–2012  
245 and 2013-2014 data collection cycles were appended, and the sampling weights modified as  
246 directed in NHANES documentation. Removal of observations with missing data was done for  
247 all analyses. Statistical analysis was done with the R *survey* package (v4.1-1) to handle  
248 complex survey designs present in NHANES. The function *survey::svydesign* was used to  
249 handle sampling weights, with primary sampling units nested within each stratum.

250 Wilcoxon Mann Whitney U test was conducted on individual chemicals in relation to  
251 farmworker or non-citizen status using the *survey::svyranktest* function. The outcome variable  
252 for chemicals was calculated as the log molarity for blood measurements and the log of the ratio  
253 of the chemical molarity to creatine molarity for urinary measurements. P-values for all tested  
254 chemicals were FDR adjusted and AUCs were calculated using the U statistic (Mason and  
255 Graham 2002).

256 Both unadjusted and adjusted logistic regression was conducted on individual chemicals  
257 in relation to farmworker or non-citizen status using the *survey::svyglm* function using a quasi-  
258 binomial model with a logit link. The outcome variable for chemicals was constructed as an  
259 indicator variable, with a 1 indicating the measurement was considered chemically bioactive.  
260 Adjusted logistic regression included variables for age at screening, race-ethnicity, BMI,  
261 education, and survey year for all chemicals, and the additional inclusion of creatine molarity for  
262 urinary measurements. P-values for all tested chemicals were FDR adjusted and AUCs were  
263 calculated using the *WeightedROC* R package (v2020.1.31) (Hocking 2020).

264 Initially, the list of pesticides under investigation included 96 different biomarkers present  
265 in NHANES, but after removing chemicals with detectability percentages below 50%, we were  
266 left with 16 chemicals for analysis (Supplementary Table 1). Assay data for these chemicals  
267 from NHANES were then extracted from the ToxCast database. We retrieved the hitcall  
268 (representative of an active assay), the activity concentration at cutoff (or ACC), and the  
269 intended target family of each ToxCast assay based on the 16 pesticides from NHANES. Using

270 the hitcall variable, we labeled assays as positive (hitcall==1) or negative (hitcall==0) to mean  
271 that an assay did or did not show bioactivity by the pesticide. We created a bioactivity ratio per  
272 chemical by dividing the number of positive assays by total number of assays. All chemicals in  
273 NHANES were present in ToxCast. However, trans-nonachlor was not maintained in the study  
274 because there were only 8 completed assays in ToxCast and none of those assays were active.  
275

### 276 **1.3 Results**

277 We first assessed demographic features of the study participants based on whether the  
278 participant had a history of farmwork or not (Tables 1 and 2). In total, there were 1,137 people  
279 who reported any farmwork history, and 20,205 who were categorized as non-farmworkers. The  
280 farmworker group was mostly women (N=697, 61.3%), Non-Hispanic White (N=635, 55.8%),  
281 U.S. Citizens (N=934, 82.1%) and 26.6% reported some college education or an associate's  
282 degree (N=302). The non-farmworker group had similar mean BMI, age, and poverty index  
283 ratio. The non-farmworker group is predominantly men (N=10,187, 50.4%), Non-Hispanic White  
284 (N=9,167, 45.4%), had U.S. Citizenship (N=17,626, 87.2%), and 19.2% reported some college  
285 or an associate's degree (N=3,885).

286 To better understand how each of the chemicals relate to each other, Table 3 outlines  
287 the pesticides by persistence and frequencies of activity of ToxCast assays. In total, there are  
288 15 pesticides that are detectable in NHANES study participants and also assayed in ToxCast.  
289 Overall, there were 5 persistent organic pesticides and 10 non-persistent pesticides included in  
290 this study. The top three most bioactive pesticides in ToxCast were heptachlor epoxide had the  
291 highest percentage of assays which were "active" (39.85%), followed by p,p'-DDT (35.73%) and  
292 p,p'- DDE (26.78%). The bioactivity threshold is the lowest ACC of the active assays for a given  
293 chemical. These values ranged from 6.5nM (2,4-Dichlorophenoxyacetic acid) to 1.45µM  
294 (chlorpyrifos).

295           Next, we wanted to compare the concentrations of chemicals required to activate the  
296 ToxCast assays to the biomarker concentrations measured in people in NHANES. Figure 1  
297 presents the distribution of pesticide concentrations among people residing in the United States  
298 in orange (retrieved from NHANES), and in blue, the ACCs of active assays retrieved from  
299 ToxCast. In this figure, where the pesticide distributions of exposure and bioactivity overlap  
300 represents pesticide exposures among the US population that are “bioactive”. Additionally, 4-  
301 nitrophenol is the only pesticide biomarker in NHANES that does not have human  
302 measurements that overlap with the bioactive distribution in NHANES.

303           We present the Mann-Whitney-U Rank Test outcomes by chemical in Supplementary  
304 Table 2 to test for differences in biomarker concentration by farmworker status, or within  
305 farmworkers, comparing between farmworkers with and without US citizenship. When  
306 quantifying the odds of having a bioactive measurement (unadjusted outcomes in Supplemental  
307 Table 3, fully adjusted outcomes presented in Figure 2 and Supplementary Tables 4 and 5), we  
308 found farmworkers were 4.3 times more likely to have a bioactive measurement in comparison  
309 to non-farmworkers for 2,4-D ( $p=2.0 \times 10^{-7}$ ) while farmworkers were significantly less likely to  
310 have a bioactive measurement of 4-Nitrophenol ( $p=2.7 \times 10^{-4}$ ). Next, we narrowed our analyses  
311 to farmworkers only and found farmworkers living without U.S. citizenships were significantly  
312 more likely to be exposed to a bioactive measurement of BHC (OR=8.4,  $p$ -value= $1.2 \times 10^{-9}$ ,  
313  $U=13.95$ ), p,p'-DDE (OR=3.0,  $p$ -value= $3.1 \times 10^{-3}$ ,  $U=9.43$ ), p,p'-DDT (OR=10.8,  $p$ -value. = $8.7 \times 10^{-4}$ ,  
314  $U=6.56$ ).

315           When trying to understand what intended target families are most affected by these  
316 chemicals, Supplementary Table 6 provides the frequency of intended target families by the  
317 pesticide. Based on individual intended assay target count, cell cycle (N=487), nuclear receptor  
318 (N=318), cytokine (N=143), DNA binding (N=172), and cell adhesion molecules (N=65) were the  
319 most frequent targets of the pesticides. Overall, p,p'-DDE (N=305) had the most intended target  
320 family counts based on positive assays, followed by p,p'-DDT (N=278), heptachlor epoxide

321 (N=259), and chlorpyrifos (N=126). Heptachlor epoxide had the highest number of positive  
322 assays targeting the cell cycle (N=123) and p,p'-DDT had the second most (N=120).  
323 Additionally, for p,p'-DDE had mostly nuclear receptor targeting positive assays (N=102),  
324 followed by the cell cycle (N=74) and DNA binding (N=64).

325

### 326 **1.3.1 Discussion**

327 When looking at individuals who have pesticide biomarker concentrations at these  
328 bioactive levels, demographics statistically differed based on bioactivity, farmwork history and  
329 citizenship status. We found NHANES participants are broadly exposed to bioactive  
330 concentrations of pesticides. Heptachlor epoxide, p,p'-DDT, and p,p'-DDE were the most  
331 bioactive pesticides in ToxCast based on overall percent of positive assays. Disproportionate  
332 exposures to bioactive concentrations of pesticides were particularly evident in farmworkers  
333 without U.S. citizenship, particularly for persistent pesticides.

334 Pesticide exposures have been associated with increased mortality due to cancer,  
335 diabetes mellitus, poisonings, and tuberculosis and other lung infection (Mills et al. 2006; Fry  
336 and Power 2017). Pesticide exposure throughout the life course has been associated with  
337 breast cancer and dysregulated mammary gland development. For example, mothers with the  
338 highest p,p-DDT concentrations were 3.7 times more likely to have daughters who developed  
339 cancer by the age of 52 in comparison to mothers with the lowest p,p-DDT blood concentrations  
340 (Cohn et al. 2015). Women who are farmworkers and not US citizens could be at increased risk  
341 of exposure-associated diseases like breast cancer – these findings warrant further  
342 investigation in this area.

343 Citizenship status is also a known barrier to health insurance and treatment (Guadamuz et  
344 al. 2020; Chasens et al. 2020), potentially compounding adverse effects of exposure to toxic  
345 chemicals like pesticides. In a study of 2,702 participants living with diabetes, non-citizens had a  
346 greater risk for poor glycemic management (OR=5.16, 95% CI: 3.73, 6.04) in comparison to

347 citizens by birth (Chasens et al. 2020). Additionally, citizens by naturalization were also at an  
348 increased risk of poor glycemic management (OR=1.95, 95% CI: 1.49,2.55) (Chasens et al.  
349 2020). Additionally, this study found that individuals with diabetes and without health insurance  
350 were almost twice as likely to have poor glycemic management compared to insured people  
351 (OR=1.99, 95% CI: 1.53-2.59). Similar outcomes have also been noted in cardiovascular  
352 disease. Using NHANES, researchers retrieved data from 2011 to 2016 to investigate  
353 prevalence, treatment, and control of hypercholesterolemia, included 11,680 US-born citizens,  
354 2,752 foreign born citizens, and 2,554 non-citizens (Guadamuz et al. 2020). In that study, over  
355 half of non-citizens did not have health insurance (52.2); which was significantly more than US-  
356 born citizens (13.6%,  $p<0.001$ ) (Guadamuz et al. 2020).

357 Non-citizens also had significantly higher prevalence of diabetes (15.7% vs. 12.8%,  
358  $p<0.001$ ) (Guadamuz et al. 2020). Treatment percentages were also significantly lower among  
359 non-citizens than US-born citizens with hypercholesterolemia (16.4% vs 45.5%), hypertension  
360 (60.3% vs. 81.1%), and diabetes (51.2% vs. 69.5%) ( $p<0.001$ ) (Guadamuz et al. 2020). Among  
361 noncitizens, those without a usual source of health care or health insurance had lower treatment  
362 percentages for hypercholesterolemia (2.7% and 8.1%), hypertension (22.2% and 39.1%), and  
363 diabetes (15.5% and 28.6%) (Guadamuz et al. 2020). It is very important to understand that  
364 overall, environmental risk factors of the many pesticides on the global market are still poorly  
365 characterized across the literature.

366

### 367 **1.3.2 Limitations and Strengths**

368 Our research shows that NHANES respondents are exposed to multiple pesticides and  
369 pesticide types. Quantifying chemical mixtures across a population is complex and methodology  
370 for understanding these mixtures is still an emerging area of research. However, there is still  
371 plenty of research to be done in understanding chemical mixtures. Much of the research on  
372 chemical health outcomes focuses on one chemical at a time, including our study, but people



373 are often exposed to more than one chemical, chemicals can interact with each other to create  
374 new chemicals and once chemicals are in the environment, they can also react with the ambient  
375 air or be degraded by the sun's rays. All these changes to chemicals in relation to mixtures and  
376 being in the environment create nuanced exposures and further research is needed to  
377 understand how these mixtures may uniquely affect the human body.

378         Some pesticides which did not meet our inclusion criteria could have different exposure  
379 based on farmwork occupational status. Oxypyrimidine (7.88% vs. 13.76%, 0.033), desethyl  
380 hydroxy DEET (17.37% vs. 11.30%,  $p = 0.015$ ), and DEET (9.17% vs 6.25%,  $p = 0.036$ ) were  
381 significantly different between farmworkers and non-farmworkers, respectively. However, all of  
382 these chemicals had detectability percentages below the cutoff for inclusion in our study. It is  
383 possible that by restricting the chemicals included we are missing some important differences in  
384 pesticide exposure between farmworkers and non-farmworkers. Studying exposures and effects  
385 of these less commonly detected pesticides could be an important area of investigation.

386         One of the major limitations of this project is that while NHANES is thorough, reliable,  
387 and valid study, it is still cross-sectional. This means the measurements within it are a single  
388 measurement in time and cannot be fully representative of chronic exposures or chronic  
389 symptomology due to exposures. Another limitation includes most farmworkers being recruited  
390 between 1999 and 2004 ( $N = 1,775$ , 69.6%), which is of importance since the recruitment and  
391 laboratory methods have been updated since 2003. Newer methods for quantifying chemicals  
392 from blood and urine samples are more sensitive and can detect lower quantities of chemicals.  
393 Additionally, farmworkers living without citizenship had significantly lower BMI as well, which  
394 may impact metabolism and accumulation of chemicals in the body.

395         An additional limitation of this study is that not every chemical is measured in every  
396 participant, and that not every assay is completed in each chemical. This limitation makes direct  
397 comparisons impossible and therefore our results are somewhat limited to group means. There  
398 are some known limitations to the ToxCast dataset such as interference of cytotoxicity. Non-

399 specific cell stress can interfere with the frequency reading since the cell is overworking to re-  
400 gain homeostasis after chemical exposure. ToxCast assays are often assessing effects in a  
401 single tissue cell type, which may not accurately reflect chemical sensitivity across organ  
402 systems or within particularly susceptible individuals. Moreover, while ToxCast maintains a  
403 robust suite of assays measuring effects across a broad spectrum of potential toxic outcomes,  
404 not every chemical is tested for every assay and not all potential biological outcomes following  
405 chemical exposure are captured.

406 Other limitations inherent to interpreting bioactivity also exist. For starters, urine and serum  
407 concentrations reflect excreted or circulating concentrations, respectively, but may not be  
408 representative of concentrations in target organs like fat, liver, kidneys, or brain. This is  
409 important because many chemicals target specific organs (e.g., organochlorines targeting the  
410 central nervous system) or bioaccumulate in specific tissue types like lipids. There are also  
411 challenges to being able to relate metabolites to their parent compounds since some chemicals  
412 can have more than one parent compound (e.g. the pyrethroid metabolite 3-PBA). This can  
413 make ascertaining what active ingredient is bioactive in the human body difficult, and even if  
414 considering a limited number of chemicals, there is no way to calculate a direct contribution of  
415 each parent compound to a non-specific metabolite.

416 A strength of our study is that it is the first to provide a comprehensive quantification of all  
417 the pesticide exposure concentrations within the US population using NHANES from 1999 to  
418 2014 and to then stratify these concentrations by social determinants of health with a focus on  
419 farmwork, fishing, and forestry work history and U.S. citizenship. By considering all the  
420 pesticides within NHANES and narrowing down to those with at least 50% detectability, we find  
421 that even within NHANES a small portion (15%) of these chemicals are detected in a majority of  
422 NHANES participants. ToxCast & NHANES are both validated, reliable study datasets created  
423 by the US government to assess chemical bioactivity and examine the health of people residing  
424 in the US. By integrating these two datasets, the results are more generalizable to the U.S.

425 population. Additionally, this study is one of few to consider health disparities associated with  
426 occupation or citizenship and how they may affect pesticide exposure and potential resultant  
427 health effects. This project can inform evidence-based guidelines and policies that are focused  
428 on reducing pesticide exposure concentrations among people residing within the United States.

429

### 430 **1.3.3 Future Directions**

431 While NHANES quantifies many chemical biomarker concentrations for each study  
432 participant, these measures do not fully capture how many chemicals each person may be  
433 exposed to since every chemical is not tested for in every person. Moreover, toxicological  
434 research should continue to focus on novel methods for assessing toxicity of chemical mixtures  
435 and interactions to better understand population pesticide exposure and bioactivity of combined  
436 pesticide exposures in at-risk individuals. Currently, research looks at predominantly the active  
437 ingredients of pesticides, but inactive ingredients used to create pesticides may also influence  
438 human health, this is currently being missed in many toxicological studies. Future research can  
439 also include temporal data on pesticide exposure. Both NHANES and ToxCast include singular  
440 exposure time points in humans and *in vitro*, respectively. However, for many farmworkers,  
441 pesticide exposure is chronic and happens over multiple exposure incidents.

442 Expanding this research to disease biomarkers, symptoms, and diagnoses will also be an  
443 important future direction. This way we can better connect target families of ToxCast assays to  
444 health outcomes and then stratify findings by occupation and social determinants of health like  
445 income, gender, citizenship, and country of birth. In this same vein of understanding social  
446 determinant effects on health, more research on how these biomarker concentration  
447 distributions differ based on residing or working in a low versus high income country will be  
448 important because laws within a nation can alter the health and exposure for many.

449

450 **Works Cited**

451

452 Abubakar Y, Tijjani H, Egbuna C, et al (2020) Pesticides, History, and Classification. In: Natural  
453 Remedies for Pest, Disease and Weed Control. Elsevier, pp 29–42

454 Adeola FO (2021) Global impact of chemicals and toxic substances on human health and the  
455 environment. In: Kickbusch I, Ganten D, Moeti M (eds) Handbook of Global Health.  
456 Springer International Publishing, Cham, pp 2227–2256

457 Attene-Ramos MS, Miller N, Huang R, et al (2013) The Tox21 robotic platform for the  
458 assessment of environmental chemicals – from vision to reality. *Drug Discov Today*  
459 18:716–723. <https://doi.org/10.1016/j.drudis.2013.05.015>

460 Barnes N (2013) Is health a labour, citizenship or human right? Mexican seasonal agricultural  
461 workers in Leamington, Canada. *Glob Public Health* 8:654–669.  
462 <https://doi.org/10.1080/17441692.2013.791335>

463 Barr DB, Wilder LC, Caudill SP, et al (2005) Urinary Creatinine Concentrations in the U.S.  
464 Population: Implications for Urinary Biologic Monitoring Measurements. *Environ Health*  
465 *Perspect* 113:192–200. <https://doi.org/10.1289/ehp.7337>

466 Briz V, Molina-Molina J-M, Sánchez-Redondo S, et al (2011) Differential Estrogenic Effects of  
467 the Persistent Organochlorine Pesticides Dieldrin, Endosulfan, and Lindane in Primary  
468 Neuronal Cultures. *Toxicol Sci* 120:413–427. <https://doi.org/10.1093/toxsci/kfr019>

469 Chasens ER, Dinardo M, Imes CC, et al (2020) Citizenship and health insurance status predict  
470 glycemic management: NHANES data 2007–2016. *Prev Med* 139:106180.  
471 <https://doi.org/10.1016/j.ypmed.2020.106180>

472 Cohn BA, La Merrill M, Krigbaum NY, et al (2015) DDT Exposure in Utero and Breast Cancer. *J*  
473 *Clin Endocrinol Metab* 100:2865–2872. <https://doi.org/10.1210/jc.2015-1841>

- 474 Dhananjayan V, Ravichandran B (2018) Occupational health risk of farmers exposed to  
475 pesticides in agricultural activities. *Curr Opin Environ Sci Health* 4:31–37.  
476 <https://doi.org/10.1016/j.coesh.2018.07.005>
- 477 Fry K, Power MC (2017) Persistent organic pollutants and mortality in the United States,  
478 NHANES 1999–2011. *Environ Health* 16:105. [https://doi.org/10.1186/s12940-017-0313-](https://doi.org/10.1186/s12940-017-0313-6)  
479 [6](https://doi.org/10.1186/s12940-017-0313-6)
- 480 Guadamuz JS, Durazo-Arvizu RA, Daviglius ML, et al (2020) Citizenship Status and the  
481 Prevalence, Treatment, and Control of Cardiovascular Disease Risk Factors Among  
482 Adults in the United States, 2011–2016. *Circ Cardiovasc Qual Outcomes* 13:e006215.  
483 <https://doi.org/10.1161/CIRCOUTCOMES.119.006215>
- 484 Hocking TD (2020) Package “WeightedROC”: Fast, weighted ROC curves. In: *Compr. R Arch.*  
485 *Netw.* <https://cran.r-project.org/web/packages/WeightedROC/WeightedROC.pdf>
- 486 Mason SJ, Graham NE (2002) Areas beneath the relative operating characteristics (ROC) and  
487 relative operating levels (ROL) curves: Statistical significance and interpretation. *Q J R*  
488 *Meteorol Soc* 128:2145–2166. <https://doi.org/10.1256/003590002320603584>
- 489 Medehouenou TCM, Ayotte P, Carmichael P-H, et al (2019) Exposure to polychlorinated  
490 biphenyls and organochlorine pesticides and risk of dementia, Alzheimer’s disease and  
491 cognitive decline in an older population: a prospective analysis from the Canadian Study  
492 of Health and Aging. *Environ Health* 18:57. <https://doi.org/10.1186/s12940-019-0494-2>
- 493 Millar JA, Forté CA (2023) ColacinoLab / Farmwork\_Citizenship\_Pesticides: Code and data  
494 used to to compare pesticide exposure and bioactivity by farmwork history and US  
495 citizenship. In: GitHub.  
496 [https://github.com/ColacinoLab/Farmwork\\_Citizenship\\_Pesticides](https://github.com/ColacinoLab/Farmwork_Citizenship_Pesticides)
- 497 Mills PK, Beaumont JJ, Nasser K (2006) Proportionate Mortality Among Current and Former  
498 Members of the United Farm Workers of America, AFL-CIO, in California 1973-2000. *J*  
499 *Agromedicine* 11:39–48. [https://doi.org/10.1300/J096v11n01\\_05](https://doi.org/10.1300/J096v11n01_05)

- 500 Mostafalou S, Abdollahi M (2013) Pesticides and human chronic diseases: Evidences,  
501 mechanisms, and perspectives. *Toxicol Appl Pharmacol* 268:157–177.  
502 <https://doi.org/10.1016/j.taap.2013.01.025>
- 503 Quesada J, Hart LK, Bourgois P (2011) Structural Vulnerability and Health: Latino Migrant  
504 Laborers in the United States. *Med Anthropol* 30:339–362.  
505 <https://doi.org/10.1080/01459740.2011.576725>
- 506 Ramos A, Carlo G, Grant K, et al (2016) Stress, Depression, and Occupational Injury among  
507 Migrant Farmworkers in Nebraska. *Safety* 2:23. <https://doi.org/10.3390/safety2040023>
- 508 Ramos AK (2018) A Human Rights-Based Approach to Farmworker Health: An Overarching  
509 Framework to Address the Social Determinants of Health. *J Agromedicine* 23:25–31.  
510 <https://doi.org/10.1080/1059924X.2017.1384419>
- 511 Ramos AK, Su D, Lander L, Rivera R (2015) Stress Factors Contributing to Depression Among  
512 Latino Migrant Farmworkers in Nebraska. *J Immigr Minor Health* 17:1627–1634.  
513 <https://doi.org/10.1007/s10903-015-0201-5>
- 514 Saxton DI, Stuesse A (2018) Workers' Decompensation: Engaged Research with Injured  
515 Im/migrant Workers: *Anthropology of Work Review*. *Anthropol Work Rev* 39:65–78.  
516 <https://doi.org/10.1111/awr.12147>
- 517 Silver MK, Arain AL, Shao J, et al (2018) Distribution and predictors of 20 toxic and essential  
518 metals in the umbilical cord blood of Chinese newborns. *Chemosphere* 210:1167–1175.  
519 <https://doi.org/10.1016/j.chemosphere.2018.07.124>
- 520 Sniegowski LT, Moody JR (1979) Determination of serum and blood densities. *Anal Chem*  
521 51:1577–1578. <https://doi.org/10.1021/ac50045a052>
- 522 Susmann H (2016) Package “RNHANES”: Facilitates analysis of CDC NHANES data. In:  
523 *Compr. R Arch. Netw.* [https://cran.r-](https://cran.r-project.org/web/packages/RNHANES/RNHANES.pdf)  
524 [project.org/web/packages/RNHANES/RNHANES.pdf](https://cran.r-project.org/web/packages/RNHANES/RNHANES.pdf)

- 525 Thomas R, Paules RS, Simeonov A, et al (2018) The US Federal Tox21 Program: A strategic  
526 and operational plan for continued leadership. *ALTEX* 35:163–168.  
527 <https://doi.org/10.14573/altex.1803011>
- 528 Wei Y, Zhu J, Nguyen A (2014) Urinary concentrations of dichlorophenol pesticides and obesity  
529 among adult participants in the U.S. National Health and Nutrition Examination Survey  
530 (NHANES) 2005–2008. *Int J Hyg Environ Health* 217:294–299.  
531 <https://doi.org/10.1016/j.ijheh.2013.07.003>
- 532 Wickham H (2016) *ggplot2: Elegant graphics for data analysis*, 3rd edn. Springer International  
533 Publishing, Cham
- 534 Wong HL, Garthwaite DG, Ramwell CT, Brown CD (2019) Assessment of occupational  
535 exposure to pesticide mixtures with endocrine-disrupting activity. *Environ Sci Pollut Res*  
536 26:1642–1653. <https://doi.org/10.1007/s11356-018-3676-5>
- 537 Zong G, Valvi D, Coull B, et al (2018) Persistent organic pollutants and risk of type 2 diabetes: A  
538 prospective investigation among middle-aged women in Nurses' Health Study II. *Environ*  
539 *Int* 114:334–342. <https://doi.org/10.1016/j.envint.2017.12.010>
- 540
- 541

542 **Statements and Declarations**

543

544 **Funding:** The researchers included on this study were supported by the National Institute of  
545 Occupational Safety and Health Education Research Center (Grant# T42 OH 008455), the  
546 National Institute of Environmental Health Sciences Environmental Toxicology and  
547 Epidemiology Program (Grant# T32 ES007062), the National Science Foundation Graduate  
548 Research Program (Grant # DGE-1256260), and the National Institutes of Health (R01  
549 ES028802, P30 ES017885, R01AG072396).

550

551 **Competing Interests:** The authors do not declare any financial conflicts of interest.

552

553 **Author Contributions:** Justin Colacino and Chanese Forté contributed to the study conception  
554 and design. Material preparation and data collection were performed by Chanese Forté.  
555 Analysis was performed by Jess Millar and Chanese Forté. The first draft of the manuscript was  
556 written by Chanese Forté and all authors commented on subsequent versions of the  
557 manuscript. All authors read and approved the final manuscript.

558

559 **Data Availability:** The NHANES and ToxCast datasets analysed during the current study are  
560 available from the CDC, <https://wwwn.cdc.gov/nchs/nhanes/>, and the EPA,  
561 <https://www.epa.gov/chemical-research/exploring-toxcast-data>.

562



563 **Tables**

564

565 Table 1. Stratified Demographics of NHANES Participants, by Farmwork Category

| Variable            | <i>Non-Farmworker</i> |                       | <i>Farmworker</i> |                       | <i>p-value</i>          |
|---------------------|-----------------------|-----------------------|-------------------|-----------------------|-------------------------|
|                     | <i>Mean</i>           | <i>Standard Error</i> | <i>Mean</i>       | <i>Standard Error</i> |                         |
| Body Mass Index     | 28.4                  | 6.7                   | 28.32             | 6.08)                 | 0.584                   |
| Age in years        | 45.88                 | 19.5                  | 48.63             | 18.81                 | 2.15x10 <sup>-4</sup>   |
| Poverty Index Ratio | 2.5                   | 1.63                  | 2.82              | 1.72)                 | 5.99x10 <sup>-5</sup>   |
|                     |                       |                       |                   |                       | < 2.2x10 <sup>-16</sup> |
| Survey Year         | <i>N=20,205</i>       | <i>Percent</i>        | <i>N=1,137</i>    | <i>Percent</i>        | <i>16</i>               |
| 1999-2000           | 1,404                 | 6.9                   | 159               | 14                    |                         |
| 2001-2002           | 1,691                 | 8.4                   | 219               | 19.3                  |                         |
| 2003-2004           | 2,890                 | 14.3                  | 358               | 31.5                  |                         |
| 2005-2006           | 1,654                 | 8.2                   | 32                | 2.8                   |                         |
| 2007-2008           | 3,626                 | 17.9                  | 87                | 7.7                   |                         |
| 2009-2010           | 3,831                 | 19                    | 154               | 13.5                  |                         |
| 2011-2012           | 3,278                 | 16.2                  | 96                | 8.4                   |                         |
| 2013-2014           | 1,831                 | 9.1                   | 32                | 2.8                   |                         |
| Gender              |                       |                       |                   |                       | 1.76x10 <sup>-10</sup>  |
| Men                 | 10,187                | 50.4                  | 440               | 38.7                  |                         |
| Women               | 10,018                | 49.6                  | 697               | 61.3                  |                         |
|                     |                       |                       |                   |                       | < 2.2x10 <sup>-16</sup> |
| Racial Ethnicity    |                       |                       |                   |                       | 16                      |
| Mexican American    | 3,517                 | 17.4                  | 278               | 24.5                  |                         |

|                         |        |      |     |      |                       |
|-------------------------|--------|------|-----|------|-----------------------|
| Other Hispanic          | 1,577  | 7.8  | 36  | 3.2  |                       |
| Non-Hispanic White      | 9,167  | 45.4 | 635 | 55.8 |                       |
| Non-Hispanic Black      | 4,435  | 22   | 135 | 11.9 |                       |
| Other Race              | 1,509  | 7.5  | 53  | 4.7  |                       |
| Country of Birth        |        |      |     |      | 0.538                 |
| <hr/>                   |        |      |     |      |                       |
| Born in 50 US states or |        |      |     |      |                       |
| DC                      | 606    | 90.2 | 0   | -    |                       |
| Born in Mexico          | 30     | 4.5  | 71  | 74   |                       |
| Born elsewhere          | 36     | 5.4  | 25  | 26   |                       |
| U.S. Citizenship        |        |      |     |      | 4.04x10 <sup>-4</sup> |
| Non-Citizen             | 2,579  | 12.8 | 203 | 17.9 |                       |
| Citizen                 | 17,626 | 87.2 | 934 | 82.1 |                       |
| <hr/>                   |        |      |     |      |                       |
|                         |        |      |     |      | < 2.2x10 <sup>-</sup> |
| Education Level         |        |      |     |      | 16                    |
| <hr/>                   |        |      |     |      |                       |
| Less than 9th grade     | 2,004  | 9.9  | 233 | 20.5 |                       |
| 9-11th grade            | 4,021  | 19.9 | 147 | 13   |                       |
| Highschool              | 4,707  | 23.3 | 210 | 18.5 |                       |
| Graduate/GED            | 5,566  | 27.6 | 243 | 21.4 |                       |
| Some College or AA      | 3,885  | 19.2 | 302 | 26.6 |                       |

566

567 P-values are derived from a chi-square test, using a Yate's Correction where necessary, and for  
 568 continuous variables, a Wilcoxon Rank Test was used with a Kruskal-Wallis Correction (as  
 569 needed). Percentages are out of the total number of respondents for that specific question. In  
 570 this table, other race includes multi-racial. In this study, 9-11 grad includes 12th grade

571 completion without a high school diploma. All values in this dataset are weighted and stratified  
572 according to NHANES guidelines.  
573

574 Table 2. Stratified Demographics of NHANES Participants with a History of Farmwork, by Citizenship

| Variable            | Citizen          |                | Non-Citizen |                | p-value                  |                          |
|---------------------|------------------|----------------|-------------|----------------|--------------------------|--------------------------|
|                     | Mean             | Standard Error | Mean        | Standard Error |                          |                          |
| Body Mass Index     | 28.52            | 6.33           | 27.37       | 4.66           | 0.038                    |                          |
| Age in years        | 49.9             | 18.9           | 42.74       | 17.07          | 7.57x10 <sup>-5</sup>    |                          |
| Poverty Index Ratio | 3.13             | 1.68           | 1.41        | 1.07           | < 2.2 x10 <sup>-16</sup> |                          |
| Variable            | N=1,007 %        |                | N=237 %     |                |                          |                          |
| Survey Year         | 1999-2000        | 139            | 14.9        | 20             | 9.9                      | 9.41x10 <sup>-05</sup>   |
|                     | 2001-2002        | 188            | 20.1        | 31             | 15.3                     |                          |
|                     | 2003-2004        | 325            | 34.8        | 33             | 16.3                     |                          |
|                     | 2005-2006        | 20             | 2.1         | 12             | 5.9                      |                          |
|                     | 2007-2008        | 66             | 7.1         | 21             | 10.3                     |                          |
|                     | 2009-2010        | 105            | 11.2        | 49             | 24.1                     |                          |
|                     | 2011-2012        | 68             | 7.3         | 28             | 13.8                     |                          |
|                     | 2013-2014        | 23             | 2.5         | 9              | 4.4                      |                          |
| Gender              | Men              | 378            | 40.5        | 62             | 30.5                     | 0.013                    |
|                     | Women            | 556            | 59.5        | 141            | 69.5                     |                          |
| Racial Ethnicity    | Mexican American | 125            | 13.4        | 153            | 75.4                     | < 2.2 x10 <sup>-16</sup> |

|                         |                                   |     |      |     |      |                          |
|-------------------------|-----------------------------------|-----|------|-----|------|--------------------------|
|                         | <i>Other Hispanic</i>             | 23  | 2.5  | 13  | 6.4  |                          |
|                         | <i>Non-Hispanic White</i>         | 622 | 66.6 | 13  | 6.4  |                          |
|                         | <i>Non-Hispanic Black</i>         | 129 | 13.8 | 6   | 3    |                          |
|                         | <i>Other Race</i>                 | 35  | 3.7  | 18  | 8.9  |                          |
| <i>Country of Birth</i> | <i>Born in 50 US states or DC</i> | 606 | 90.2 | 0   | 0    | < 2.2 x10 <sup>-16</sup> |
|                         | <i>Born in Mexico</i>             | 30  | 4.5  | 71  | 74   |                          |
|                         | <i>Born elsewhere</i>             | 36  | 5.4  | 25  | 26   |                          |
| <i>Education Level</i>  | <i>Less than 9th grade</i>        | 110 | 11.8 | 123 | 60.6 | < 2.2 x10 <sup>-16</sup> |
|                         | <i>9-11th grade</i>               | 115 | 12.3 | 32  | 15.8 |                          |
|                         | <i>Highschool</i>                 | 183 | 19.6 | 27  | 13.3 |                          |
|                         | <i>Graduate/GED</i>               | 234 | 25.1 | 9   | 4.4  |                          |
|                         | <i>Some College or AA</i>         | 290 | 31.1 | 12  | 5.9  |                          |

575

576 P-values are derived from a chi-square test, using a Yate's Correction where necessary, and a Wilcoxon Rank Test was completed  
577 with a Kruskal-Wallis Correction. Percentages are out of the total number of respondents for that specific question. In this table,  
578 other race includes multi-racial. In this study, 9-11 grad includes 12th grade completion without a high school diploma.

579

580 Table 3. Bioactivity of pesticides cross-listed between NHANES and ToxCast, by pesticide and  
 581 persistence

| <i>Common Name</i>                   | <i>CAS-RN</i> | <i>Total Assays</i> | <i>Positive Assays</i> | <i>Bio-active Assay Percentage</i> | <i>Bioactivity Threshold (μM)</i> |
|--------------------------------------|---------------|---------------------|------------------------|------------------------------------|-----------------------------------|
| 2,4-Dichlorophenol                   | 120-83-2      | 678                 | 27                     | 3.98                               | 0.34                              |
| 2,4-Dichlorophenoxyacetic acid       | 94-75-7       | 807                 | 18                     | 2.23                               | 6.49x10 <sup>-3</sup>             |
| 2,5-Dichlorophenol                   | 583-78-8      | 599                 | 14                     | 2.34                               | 0.33                              |
| 3-Phenoxybenzoic acid                | 3739-38-6     | 622                 | 11                     | 1.77                               | 0.23                              |
| 3,5,6-Trichloropyridinol             | 6515-38-4     | 433                 | 21                     | 4.85                               | 1.35                              |
| 4-Nitrophenol                        | 100-02-7      | 682                 | 43                     | 6.30                               | 8.63x10 <sup>-3</sup>             |
| β-hexachlorocyclohexane <sup>a</sup> | 319-85-7      | 654                 | 24                     | 3.67                               | 0.03                              |
| Chlorpyrifos                         | 2921-88-2     | 639                 | 126                    | 19.72                              | 1.45                              |
| Chlorpyrifos-oxon                    | 5598-15-2     | 693                 | 132                    | 19.05                              | 0.04                              |

|                                 |          |      |     |       |      |
|---------------------------------|----------|------|-----|-------|------|
| DEET Acid                       | 134-62-3 | 1025 | 13  | 1.27  | 0.17 |
| Dieldrin <sup>a</sup>           | 60-57-1  | 549  | 121 | 22.04 | 0.32 |
| p,p'-DDE <sup>a</sup>           | 72-55-9  | 1139 | 305 | 26.78 | 0.31 |
| p,p'-DDT <sup>a</sup>           | 50-29-3  | 778  | 278 | 35.73 | 0.43 |
| Heptachlor Epoxide <sup>a</sup> | 76-44-8  | 650  | 259 | 39.85 | 1.31 |

---

582

583 <sup>a</sup>Persistent Organic Pollutant.

584 A positive assay is defined as hitcall==1. The bioactivity assay percentage is created by dividing  
585 the total number of positive assays by the total number of assays and multiplying by 100%.

586 Bioactivity ratio per chemical was calculated by dividing the count of positive assays by the total  
587 number of assays within the US Environmental Protection Agency's Toxicity Forecast

588 Dashboard database.

589

590 **Figures**

591

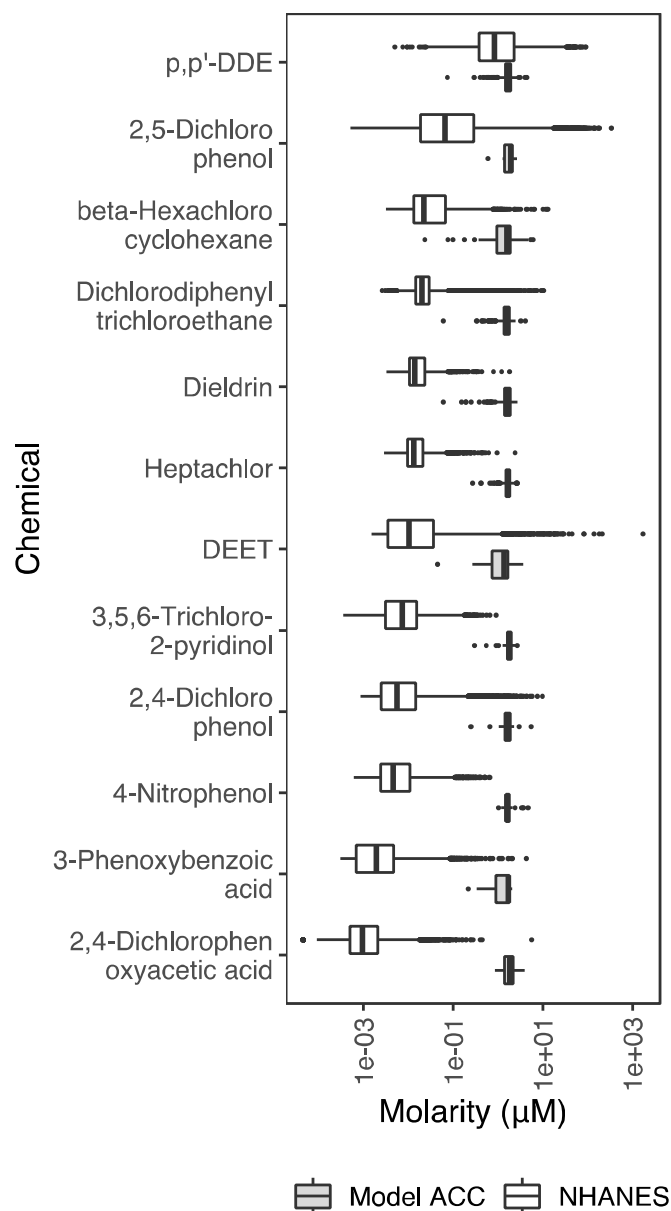

592

593 Figure 1. Comparing the chemical molarity of of NHANES subjects with bioactivity thresholds

594 taken from chemical assays. ACC is the activity concentration at cut-off for a specific assay

595 where a chemical is considered active.

596



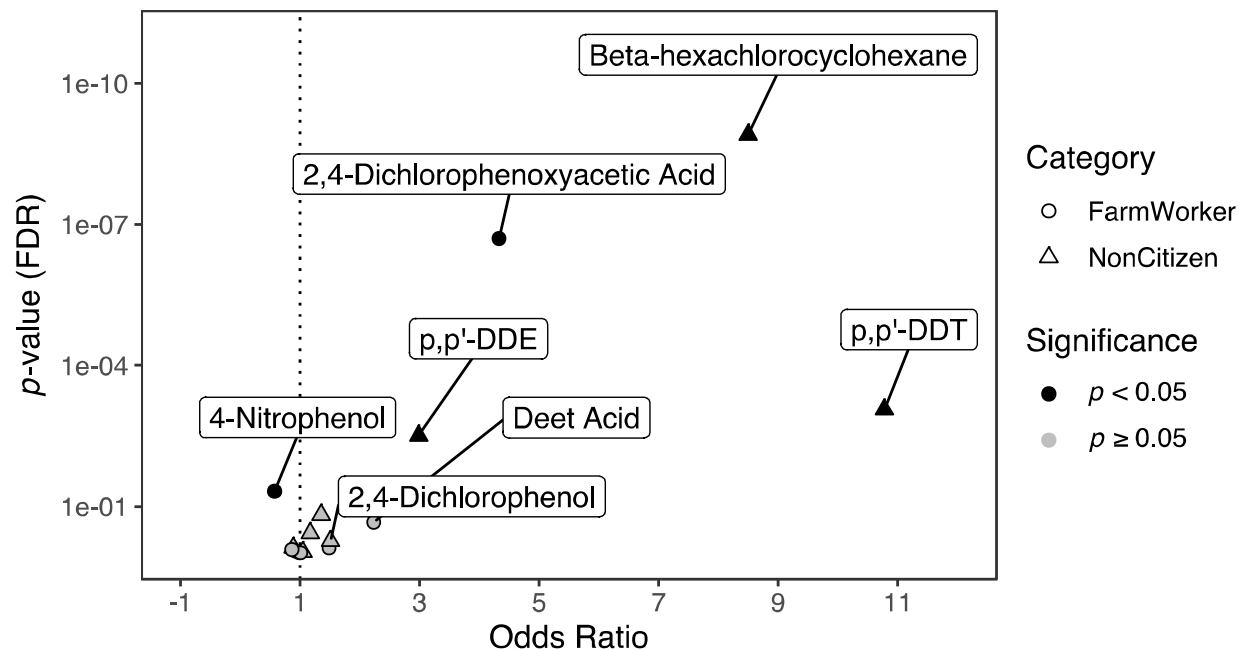

597

598 Figure 2. Comparing the odds of having a bioactive pesticide biomarker concentration by  
599 farmwork history and for farmworkers only by citizenship. This figure presents the outcomes of  
600 the regression model of farmworker and non-farmworker health outcomes. Bioactive was  
601 defined as having at least one pesticide biomarker concentration that was the same or higher  
602 concentration than the minimal concentration needed to see an effect. The data for this table  
603 was retrieved from the U.S. EPA's Toxicity Forecast Dashboard and the National Health and  
604 Nutrition Examination Survey.
